# Supplementary material for: Three Dopamine Pathways Induce Aversive Odor Memories with Different Stability
Source: PubMed Central journal article supplement (PMC3395599; doi:10.1371/journal.pgen.1002768), 2012-07-12
Supplement: pgen.1002768.s005.pdf [file pgen.1002768.s005.pdf]

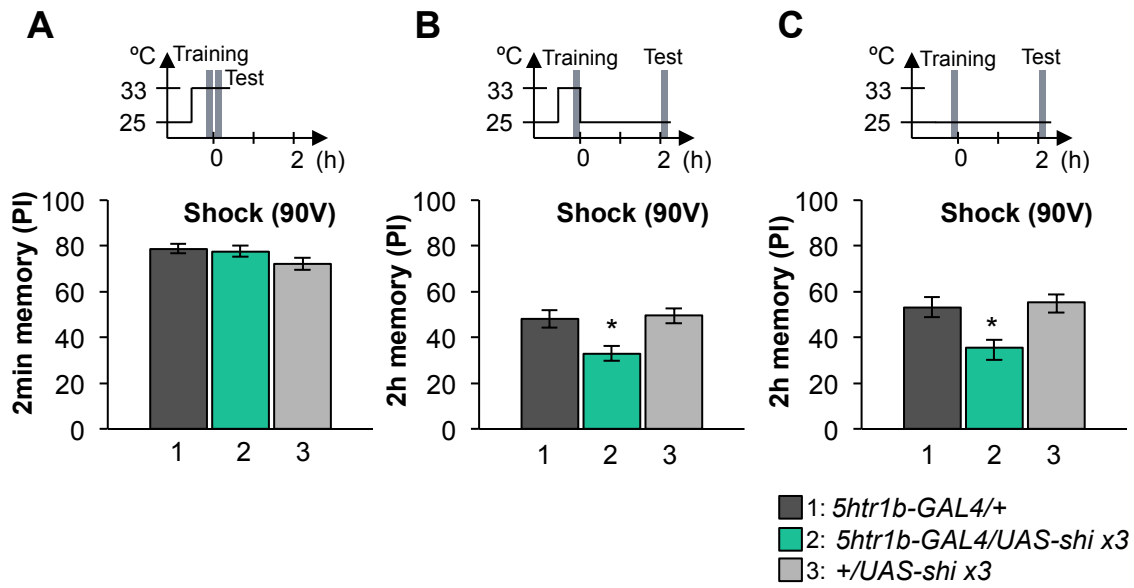

Aso et al., Figure S5
